# Supplementary material for: Structural insight into glucose repression of the mannitol operon
Source: PubMed Central journal article supplement (PMC6763467; doi:10.1038/s41598-019-50249-2), 2019-09-26
Supplement: 41598_2019_50249_MOESM1_ESM.pdf [file 41598_2019_50249_MOESM1_ESM.pdf]

## **Structural insight into glucose repression of the mannitol operon.**

Mangyu Choe<sup>1†</sup>, Huitae Min<sup>1†</sup>, Young-Ha Park<sup>1</sup>, Yeon-Ran Kim<sup>1</sup>, Jae-Sung Woo<sup>2\*</sup> & Yeong-Jae Seok<sup>1\*</sup>

<sup>1</sup>School of Biological Sciences and Institute of Microbiology, Seoul National University, Seoul 00826, Korea.

<sup>2</sup>Department of Life Sciences, Korea University, 145 Anam-ro, Seongbuk-gu, Seoul 02841, Republic of Korea

<sup>†</sup>Mangyu Choe and Huitae Min equally contributed to this work.

\*Correspondence and requests for materials should be addressed to J.S.W. (e-mail: [jaesungwoo@korea.ac.kr](mailto:jaesungwoo@korea.ac.kr)) or Y.J.S. (e-mail: [yjseok@snu.ac.kr](mailto:yjseok@snu.ac.kr)).

### **Supplementary Informations**

**Supplementary Figures 1-8**

**Supplementary Table 1-2**

**Supplementary references**

**A. In the presence of glucose and mannitol**

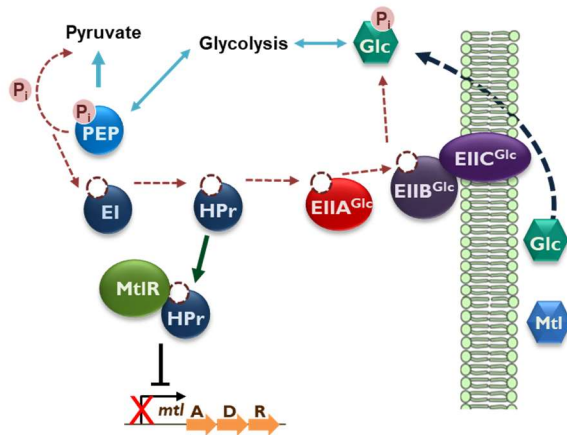

**B. In the presence of mannitol alone**

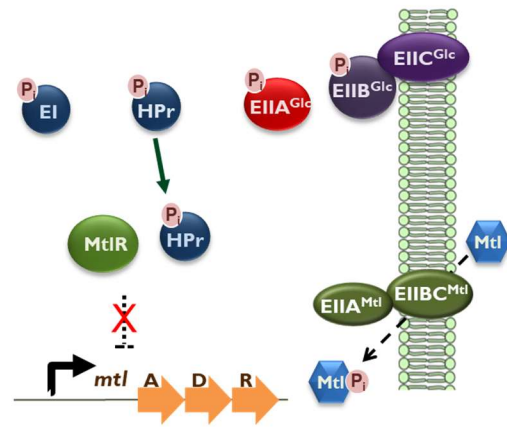

**Supplementary Figure 1. A schematic view of the current model for glucose repression of the *mtl* operon in *E. coli*.**

In the presence of glucose, the phosphoryl group of phosphoenolpyruvate (PEP) is sequentially transferred through EI, HPr and EII<sup>Glc</sup> to glucose, and therefore HPr and EIIA<sup>Glc</sup> are predominantly dephosphorylated. Dephospho-HPr interacts with MtlR, a transcriptional repressor of the *mtl* operon, to augment its repressor activity. In the absence of glucose, however, phosphorylation of HPr increases. Since phosphorylation of HPr hinders the formation of the HPr-MtlR complex, the *mtl* operon can be induced.

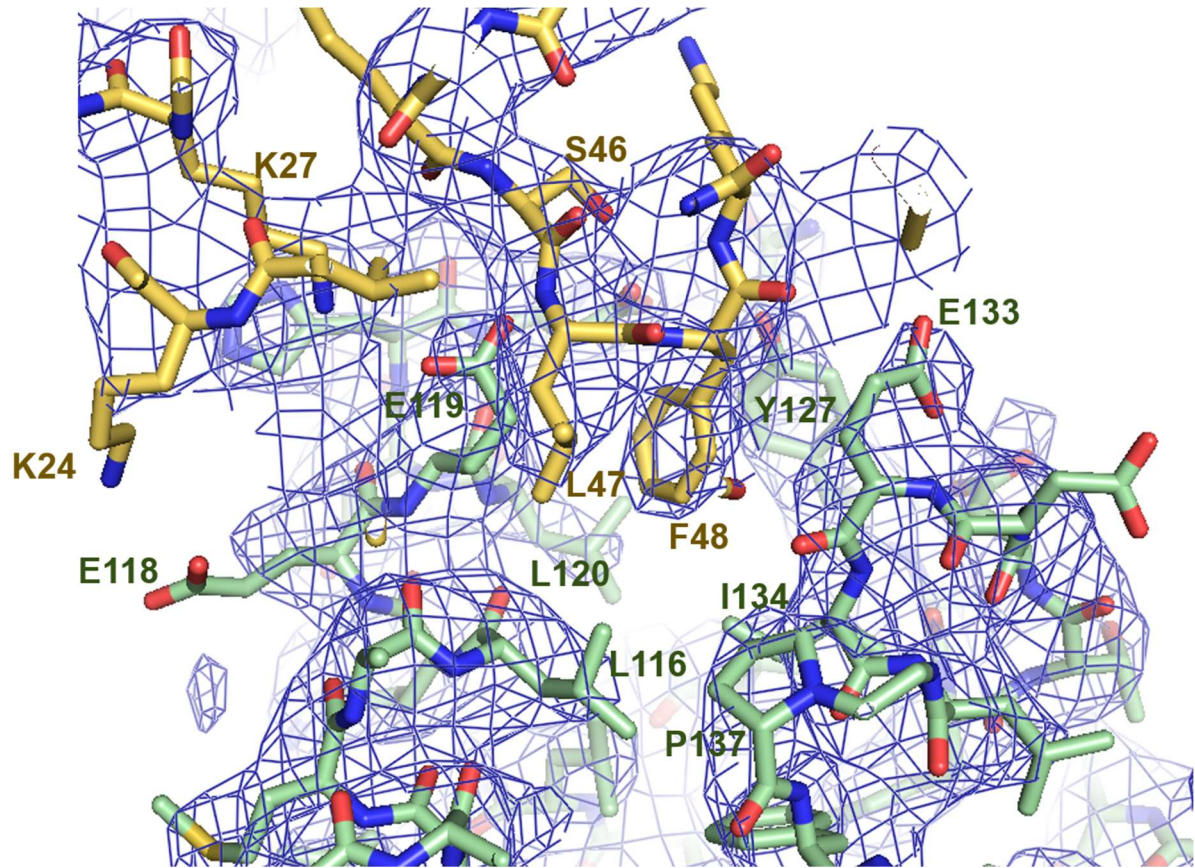

**Supplementary Figure 2. Close-up view of the binding interface between MtlR and HPr.** MtlR, HPr and electron density are shown in green (stick), yellow (stick) and blue (mesh), respectively. The residues participating in the intermolecular interaction are labeled.

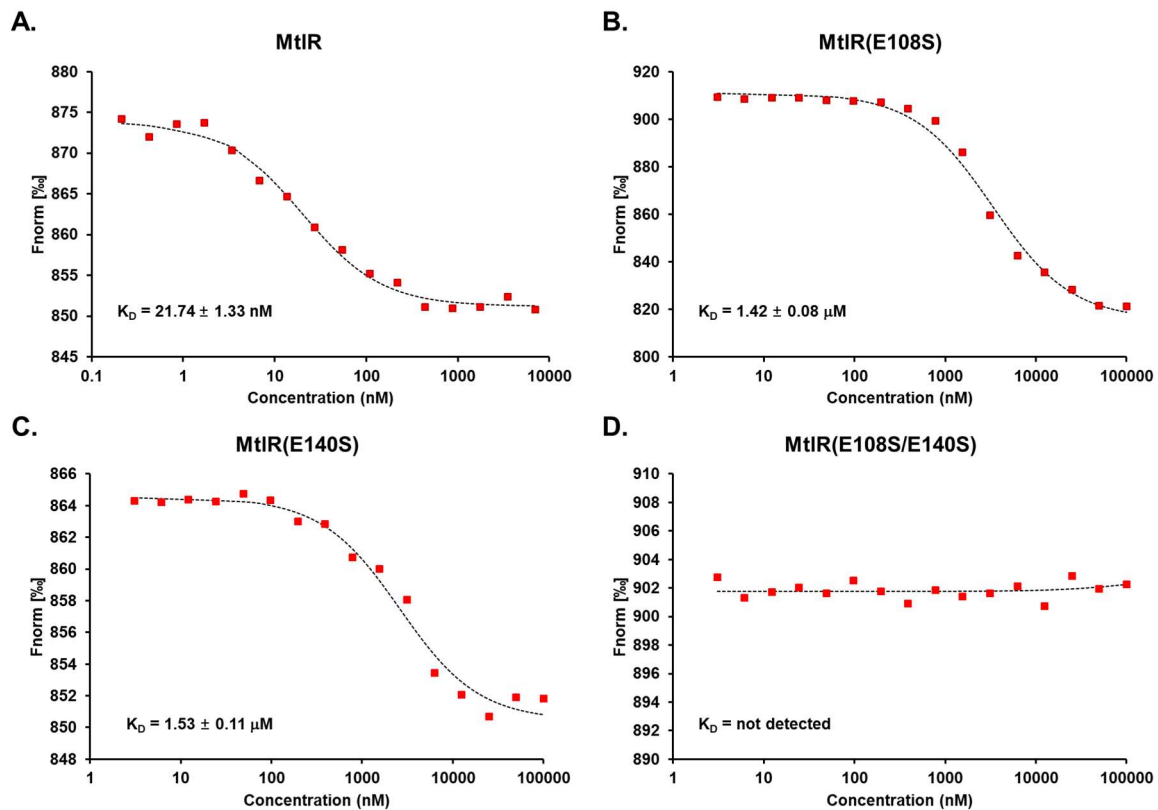

**Supplementary Figure 3. Measurement of the dissociation constant ( $K_D$ ) between MtlR variants and HPr.**

Each purified MtlR variant was serially diluted and mixed with fluorescence-labeled HPr. The reaction mixture was loaded into a standard treated capillary (NanoTemper Technologies) and subsequently analyzed by microscale thermophoresis (MST) at 20% MST power and a light-emitting diode (LED) intensity of 10%. Analysis of the interaction by thermophoresis was performed with a laser on for 30 s. All experiments were repeated three times and representative data are shown here. The  $K_D$  values and standard deviations were determined using MO Affinity Analysis software version 2.2.7.

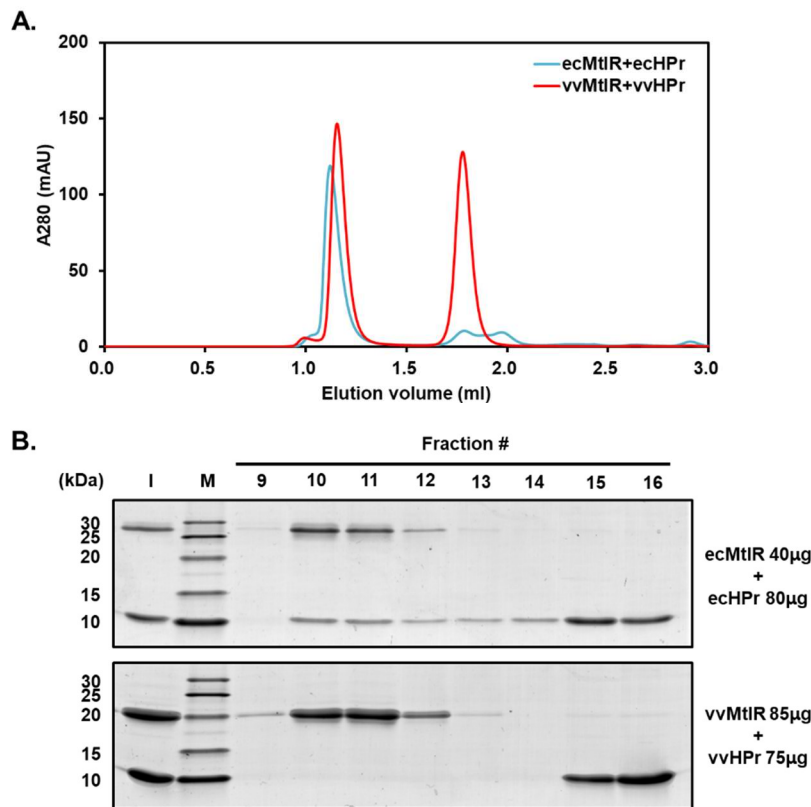

**Supplementary Figure 4. Gel filtration chromatography of the MtlR-HPr complex of *E. coli* and *V. vulnificus*.**

Gel filtration chromatography was performed on a Superdex 75 increase 5/150 GL column (GE Healthcare Life Sciences) equilibrated with the running buffer containing 20 mM Tris-HCl (pH 7.5), 50 mM NaCl, 2 mM  $\beta$ -mercaptoethanol and 5% glycerol at a flow rate of 0.2 ml/min using an Agilent 1260 infinity Binary LC system. (A) A protein mixture containing *E. coli* MtlR (40  $\mu$ g) and *E. coli* HPr (80  $\mu$ g) was prepared in 50  $\mu$ l of the running buffer (blue line) and one containing *V. vulnificus* MtlR (85  $\mu$ g) and *V. vulnificus* HPr (75  $\mu$ g) in 20  $\mu$ l of the running buffer (red line). Both mixtures were incubated for 10 min on ice and then injected into the column, and their absorbance profiles at 280 nm are shown. It should be noted *E. coli* HPr exhibits a significantly lower absorbance at 280 nm than *V. vulnificus* HPr, since the former has no tryptophan, tyrosine or cysteine whereas the latter has a tyrosine residue. (B) Fractions (120  $\mu$ l each) from the gel filtration column were collected, and 10  $\mu$ l of each fraction was analyzed by 4-20% SDS-PAGE followed by staining with Coomassie brilliant blue R-250. Lane M indicates the PageRuler™ Unstained Protein Ladder (Thermo Scientific), and the molecular masses (in kDa) of some standards are presented on the left. “I” indicates an aliquot of the injected mixture.

```

          * * ↓ 20          ↓ *          40          ↓ ↓ ↓ ↓ ↓ 60
ecHPr : MFQQEVITITAPNGLHTRPAAQFVKEAKGFTSEITVTSNGKSASAKSLFKLQTLGLTQCTVVVTISAEGEDECK : 72
vpHPr : MYEKQVEITAEENGLHTRPAAQFVKEAKAFDADITVTSNGKSASAKSLFKLQTLGLVKGTLVVTISAEGPQACQ : 72
vvHPr : MYEKQVEITAEENGLHTRPAAQFVKEAKAFDADITVTSNGKSASAKSLFKLQTLGLVKGTVVTISAEGPQACQ : 72
vcHPr : MYEKQVEITAEENGLHTRPAAQFVKEAKAFDADITVTSNGKSASAKSLFKLQTLGLVKGTVVTISAEGPQAKE : 72
      MyekqVeITAEENGLHTRPAAQFVKEAKaFdadITVTSNGKSASAKSLFKLQTLGLvkGTvVTISAEGpqaq

          80
ecHPr : AVEHLVRLMAELE : 85
vpHPr : AVDHLVALMDQLH : 85
vvHPr : AVDHLVALMDQLH : 85
vcHPr : AVEHLVALMDQLH : 85
      AV HLVaLMdqLh

```

**Supplementary Figure 5. Amino acid sequence alignment of HPr among *E. coli* and *Vibrio* species using ClustalX2.**

Conserved residues are highlighted in black (100%) and gray (75%). The residues identified to be involved in the interaction with MtlR in this study are indicated by red arrows and the five residues tested for their involvement in the interaction with MtlR in a previous study<sup>1</sup> are indicated by asterisks. ec, *E. coli*; vp, *V. parahaemolyticus*; vv, *V. vulnificus*; vc, *V. cholerae*.



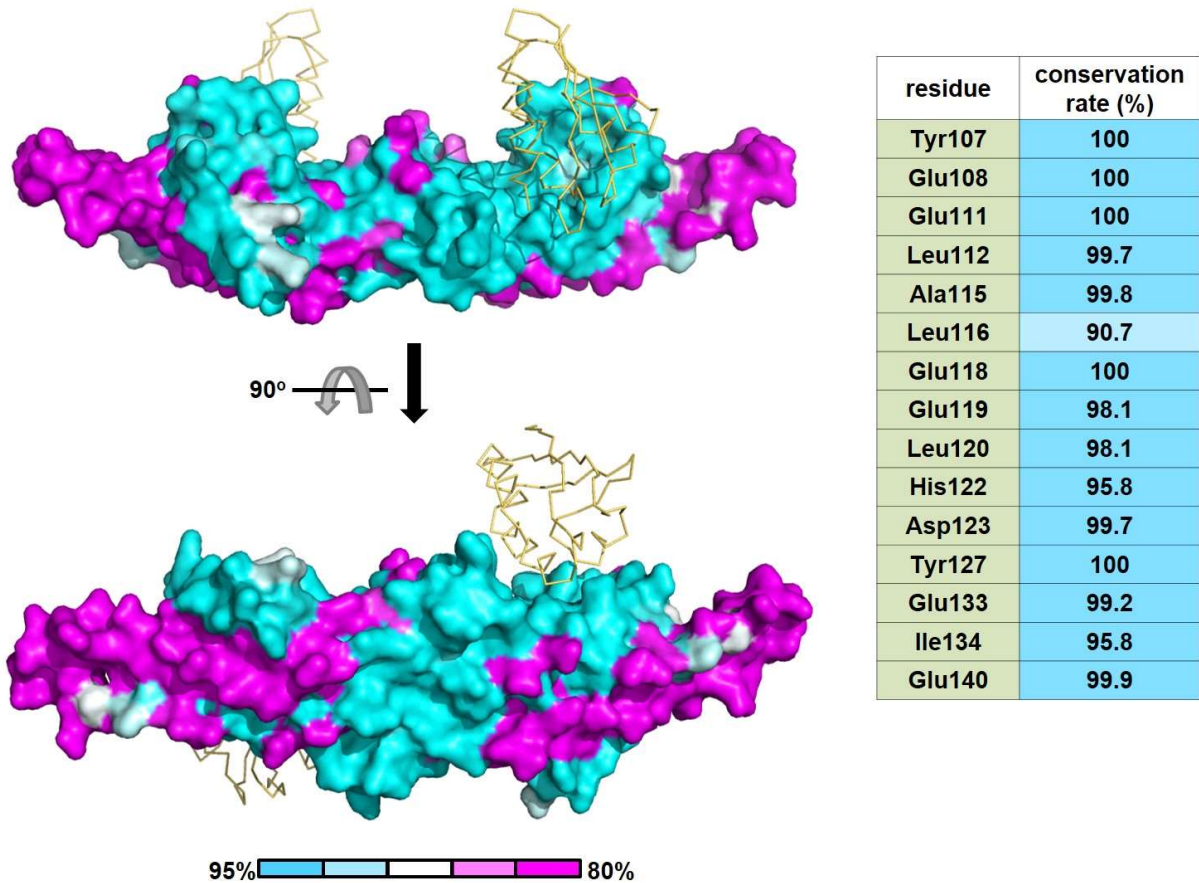

**Supplementary Figure 6. The HPr-binding site is highly conserved in *Enterobacteriaceae* MtlRs.**

The conservation rate of each residue of MtlR was calculated by multiple sequence alignment. Amino acid sequences of MtlRs from 1000 *Enterobacteriaceae* genomes were aligned and the residue conservation rates are color-coded onto the surface of *E. coli* MtlR. The color bar indicates the conservation rate.

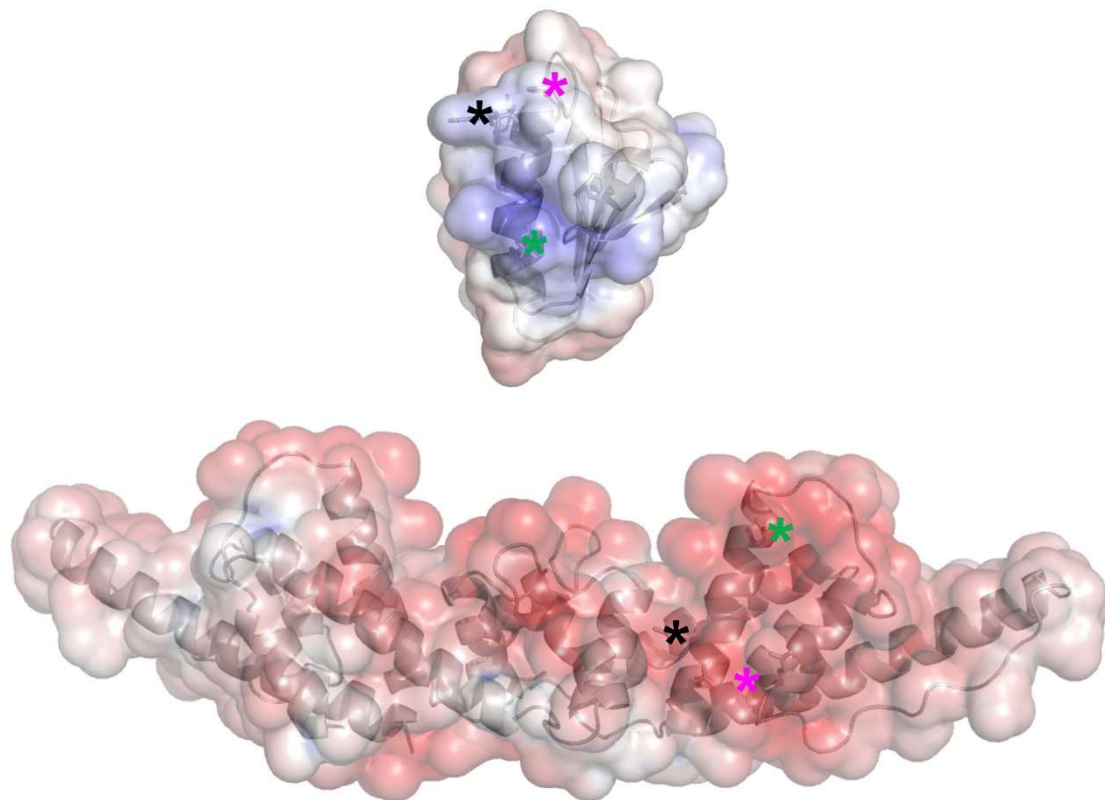

**Supplementary Figure 7. Three electrostatic interaction pairs in the binding interface of MtlR and HPr are important for their binding affinity and specificity.**

Three electrostatic interaction pairs are marked with asterisks in magenta (H15 of HPr with E108 and E140 of MtlR), black (R17 of HPr with E111 of MtlR) and green (K27E of HPr with E119 of MtlR). Surface electrostatic potential is generated as described in the legend to Figure 4, and represented as a transparent surface.



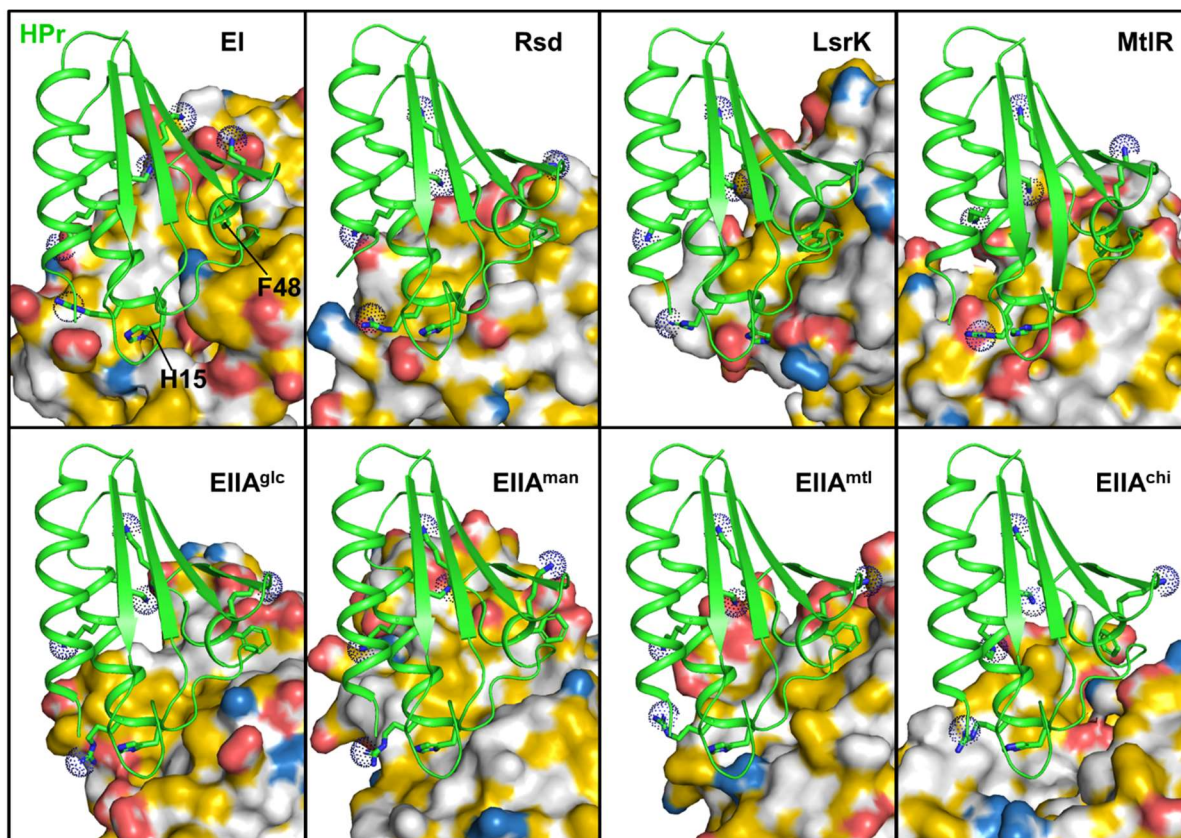

**Supplementary Figure 8. HPr recognition mechanisms of various HPr-binding proteins.**

HPr-binding proteins are shown as surface presentations with YRB highlighting<sup>2</sup>. Hydrophobic atoms, negatively charged atoms, and positively charged atoms are colored yellow, red, and blue, respectively. HPr molecules (green) are at the same orientation and shown as ribbon drawings. Phe48 and His15 of HPr are in sticks and labeled. Four lysine and one arginine residues on the basic surface of HPr are shown as sticks, and positively charged nitrogen atoms in the residues are highlighted by dots. PDB accession codes for coordinates are 3EZE (EI), 4XWJ (RsdI), 5YA1 (LsrK), 1GGR (EIIA<sup>Glc</sup>), 1VRC (EIIA<sup>Man</sup>), 1J6T (EIIA<sup>Mtl</sup>), and 2LRK (EIIA<sup>Chi</sup>).

**Supplementary Table 1. Data collection and refinement statistics.**

|                                            | MtlR-Hpr           |
|--------------------------------------------|--------------------|
| <b>Data collection</b>                     |                    |
| Space group                                | <i>I</i> 222       |
| Cell dimensions                            |                    |
| <i>a</i> , <i>b</i> , <i>c</i> (Å)         | 97.4, 122.3, 147.5 |
| $\alpha$ , $\beta$ , $\gamma$ (°)          | 90, 90, 90         |
| Resolution (Å)                             | 30 – 3.5           |
| $R_{\text{sym}}$ or $R_{\text{merge}}$ (%) | 7.2 (73.0)*        |
| $I / \sigma I$                             | 22.3 (1.7)         |
| Completeness (%)                           | 99.8 (100)         |
| Redundancy                                 | 6.4 (6.3)          |
| <b>Refinement</b>                          |                    |
| Resolution (Å)                             | 30 – 3.5           |
| No. reflections                            | 11374              |
| $R_{\text{work}} / R_{\text{free}}$        | 24.0 / 26.0        |
| No. atoms                                  |                    |
| Protein                                    | 3908               |
| <i>B</i> -factors                          |                    |
| Protein                                    | 138.2              |
| R.m.s deviations                           |                    |
| Bond lengths (Å)                           | 0.002              |
| Bond angles (°)                            | 0.538              |
| Ramachandran plot (%)                      |                    |
| Favored                                    | 94.55              |
| Allowed                                    | 5.45               |

\*Highest resolution shell is shown in parenthesis.

**Supplementary Table 2. Bacterial strains and plasmids used in this study.**

| Strains or plasmid                  | Genotype or phenotype                                                                                                                                                                                                                             | Source or Reference |
|-------------------------------------|---------------------------------------------------------------------------------------------------------------------------------------------------------------------------------------------------------------------------------------------------|---------------------|
| <b><i>E. coli</i> strains</b>       |                                                                                                                                                                                                                                                   |                     |
| MG1655                              | Wild-type <i>E. coli</i> K-12                                                                                                                                                                                                                     | 3                   |
| MG1655 <i>mtlR</i> (E108/140S)      | MG1655 <i>mtlR</i> :: <i>mtlR</i> (E108S/E140S)                                                                                                                                                                                                   | This study          |
| GI698                               | F <sup>-</sup> $\lambda$ - <i>lacI</i> <sup>q</sup> <i>lacPL8 ampC</i> ::P <sub>trp</sub> cI                                                                                                                                                      | 4                   |
| GI698 $\Delta$ <i>pts</i>           | GI698 <i>ptsHlerr</i> ::Km <sup>r</sup>                                                                                                                                                                                                           | 5                   |
| ER2566                              | F <sup>-</sup> $\lambda$ - <i>fhuA2</i> [ <i>lon</i> ] <i>ompT lacZ</i> ::T7 <i>gene 1 gal sulA11</i><br>$\Delta$ ( <i>mcrC-mrr</i> )114:: <i>IS10 R(mcr-73)::miniTn10-TetS</i> )2<br><i>R(zgb-210)::Tn10</i> ( <i>TetS endA1</i> [ <i>dcm</i> ]) | New England Biolabs |
| <b><i>V. vulnificus</i> strains</b> |                                                                                                                                                                                                                                                   |                     |
| CMCP6                               | Clinical isolate                                                                                                                                                                                                                                  | 6                   |
| <b>Plasmid</b>                      |                                                                                                                                                                                                                                                   |                     |
| pRE1                                | Expression vector under control of $\lambda$ P <sub>L</sub> promoter, Amp <sup>r</sup>                                                                                                                                                            | 7                   |
| pSP100                              | pRE1-based expression vector for HPr                                                                                                                                                                                                              | 8                   |
| pET43.1a                            | Cloning vector; Amp <sup>r</sup>                                                                                                                                                                                                                  | Novagen             |
| pET-MtlR                            | <i>E. coli mtlR</i> ORF cloned between NdeI and XhoI sites of pET43.1a                                                                                                                                                                            | 1                   |
| pET-HisMtlR                         | His <sub>6</sub> tag added to the N-terminus of MtlR in pET-MtlR                                                                                                                                                                                  | This study          |
| pET-HisMtlR(E108S)                  | Glu108 of MtlR in pET-HisMtlR was mutated to Ser                                                                                                                                                                                                  | This study          |
| pET-HisMtlR(E140S)                  | Glu140 of MtlR in pET-HisMtlR was mutated to Ser                                                                                                                                                                                                  | This study          |
| pET-HisMtlR(L112A)                  | Lys112 of MtlR in pET-HisMtlR was mutated to Ala                                                                                                                                                                                                  | This study          |
| pET-HisMtlR(A115W)                  | Ala115 of MtlR in pET-HisMtlR was mutated to Trp                                                                                                                                                                                                  | This study          |
| pET-HisMtlR(E108S/E140S)            | Glu108 and Glu140 of MtlR in pET-HisMtlR were mutated to Ser                                                                                                                                                                                      | This study          |
| pETDeut                             | Cloning vector; Amp <sup>r</sup>                                                                                                                                                                                                                  | Novagen             |
| pETDeut-vvHisMtlR                   | <i>V. vulnificus mtlR</i> ORF cloned between NdeI and XhoI sites of pETDeut                                                                                                                                                                       | This study          |
| pRK415                              | Broad host range vector, IncP <i>ori</i> , <i>oriT</i> of RK2; Tc <sup>r</sup>                                                                                                                                                                    | 9                   |
| pKD46                               | Red recombinase expression plasmid under the control of arabinose inducible promoter                                                                                                                                                              | 10                  |

## Supplementary References

- 1 Choe, M., Park, Y. H., Lee, C. R., Kim, Y. R. & Seok, Y. J. The general PTS component HPr determines the preference for glucose over mannitol. *Sci Rep* **7**, 43431, doi:10.1038/srep43431 (2017).
- 2 Hagemans, D., van Belzen, I. A., Moran Luengo, T. & Rudiger, S. G. A script to highlight hydrophobicity and charge on protein surfaces. *Front Mol Biosci* **2**, 56, doi:10.3389/fmolb.2015.00056 (2015).
- 3 Blattner, F. R. *et al.* The complete genome sequence of *Escherichia coli* K-12. *Science* **277**, 1453-1462 (1997).
- 4 LaVallie, E. R. *et al.* A thioredoxin gene fusion expression system that circumvents inclusion body formation in the *E. coli* cytoplasm. *Biotechnology (N Y)* **11**, 187-193 (1993).
- 5 Nosworthy, N. J. *et al.* Phosphorylation destabilizes the amino-terminal domain of enzyme I of the *Escherichia coli* phosphoenolpyruvate:sugar phosphotransferase system. *Biochemistry* **37**, 6718-6726, doi:10.1021/bi980126x (1998).
- 6 Kim, Y. R. *et al.* Characterization and pathogenic significance of *Vibrio vulnificus* antigens preferentially expressed in septicemic patients. *Infect Immun* **71**, 5461-5471 (2003).
- 7 Reddy, P., Peterkofsky, A. & McKenney, K. Hyperexpression and purification of *Escherichia coli* adenylate cyclase using a vector designed for expression of lethal gene products. *Nucleic Acids Res* **17**, 10473-10488 (1989).
- 8 Garrett, D. S., Seok, Y. J., Peterkofsky, A., Clore, G. M. & Gronenborn, A. M. Identification by NMR of the binding surface for the histidine-containing phosphocarrier protein HPr on the N-terminal domain of enzyme I of the *Escherichia coli* phosphotransferase system. *Biochemistry* **36**, 4393-4398, doi:10.1021/bi970221q (1997).
- 9 Keen, N. T., Tamaki, S., Kobayashi, D. & Trollinger, D. Improved broad-host-range plasmids for DNA cloning in gram-negative bacteria. *Gene* **70**, 191-197 (1988).
- 10 Datsenko, K. A. & Wanner, B. L. One-step inactivation of chromosomal genes in *Escherichia coli* K-12 using PCR products. *Proc Natl Acad Sci U S A* **97**, 6640-6645, doi:10.1073/pnas.120163297 (2000).
